# Supplementary material
Source: publisher figshare collection journal article supplement (https://acs.figshare.com/ndownloader/files/26187388)
Supplement: Supplementary file 1 [file 26187388]

**Supporting Information**

**Several Shapes of Single Crystalline Gold  
Nanomaterials Prepared in the Surfactant Mixture  
of CTAB and Pluronics**

*Soo Ik Park, and Hyon-Min Song\**

Department of Chemistry, Dong-A University, Busan 604-714, South Korea

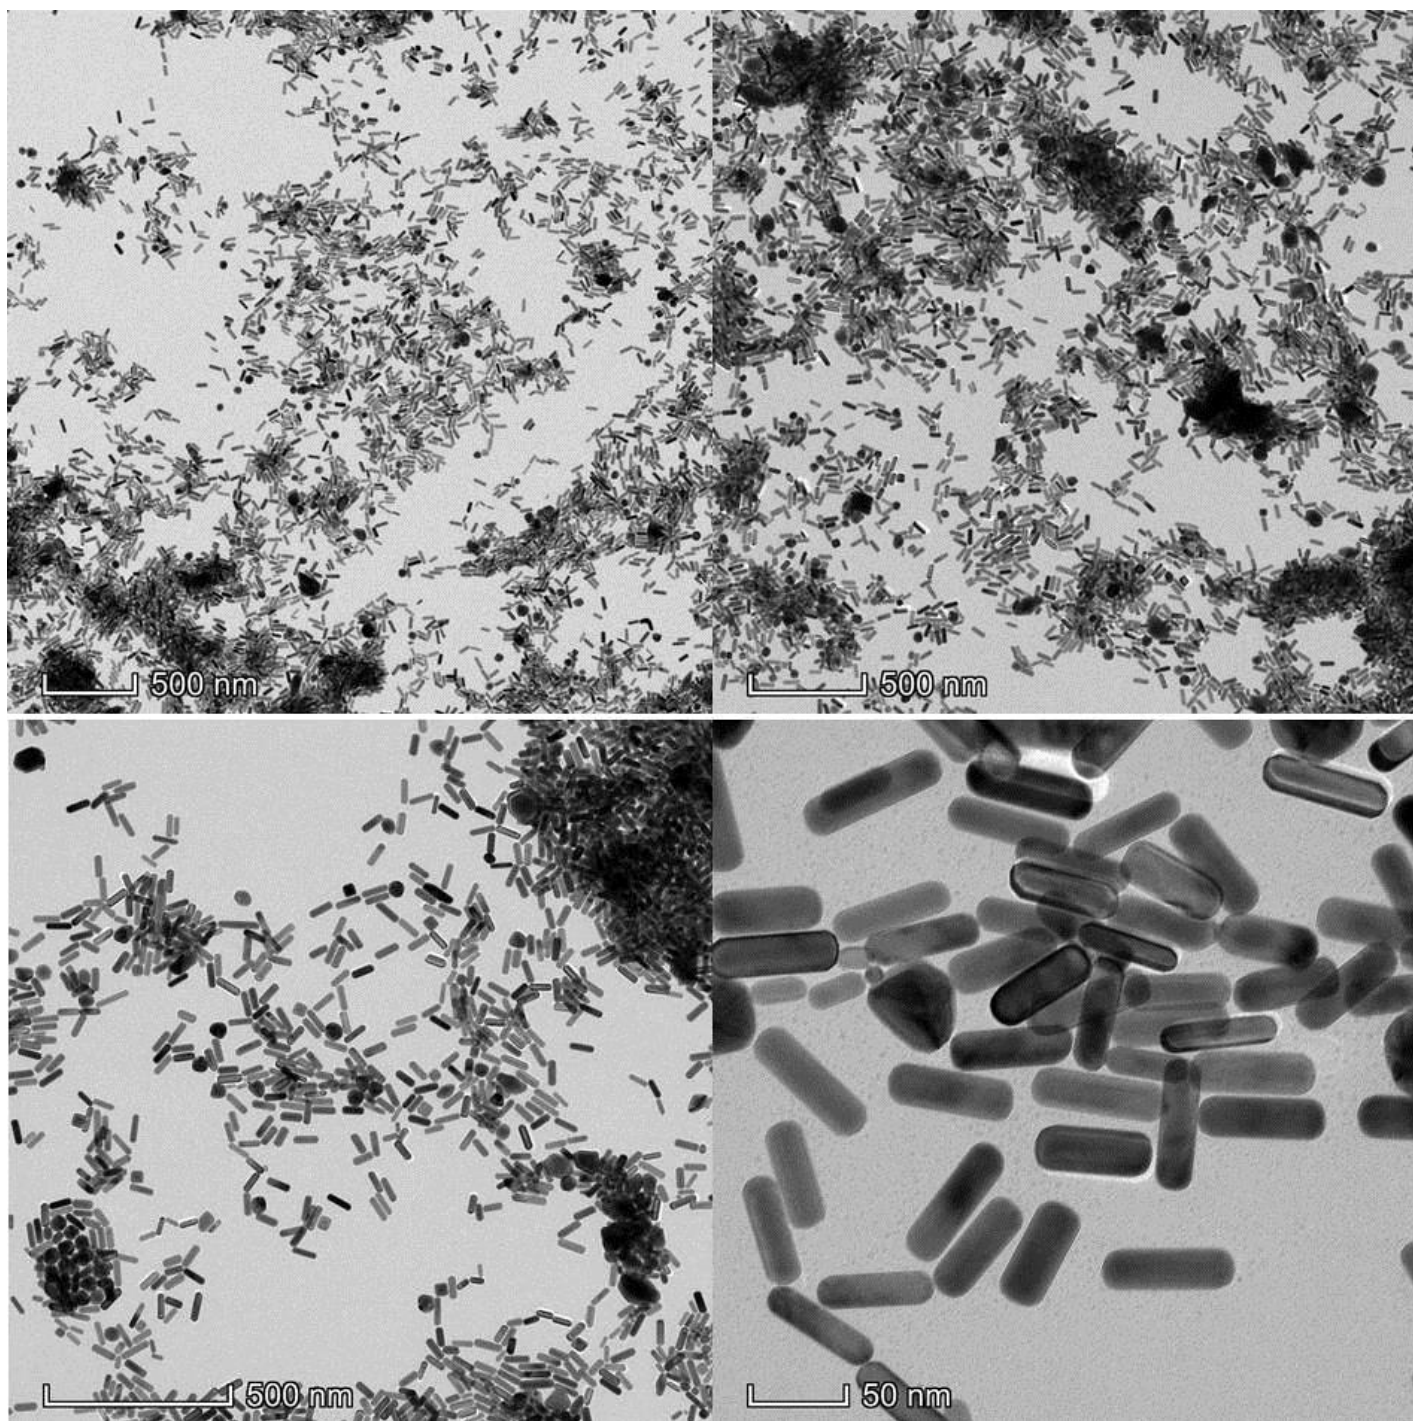

**Figure S1.** TEM images of gold nanorods prepared with Pluronic L-31 (17.9%, Au1).

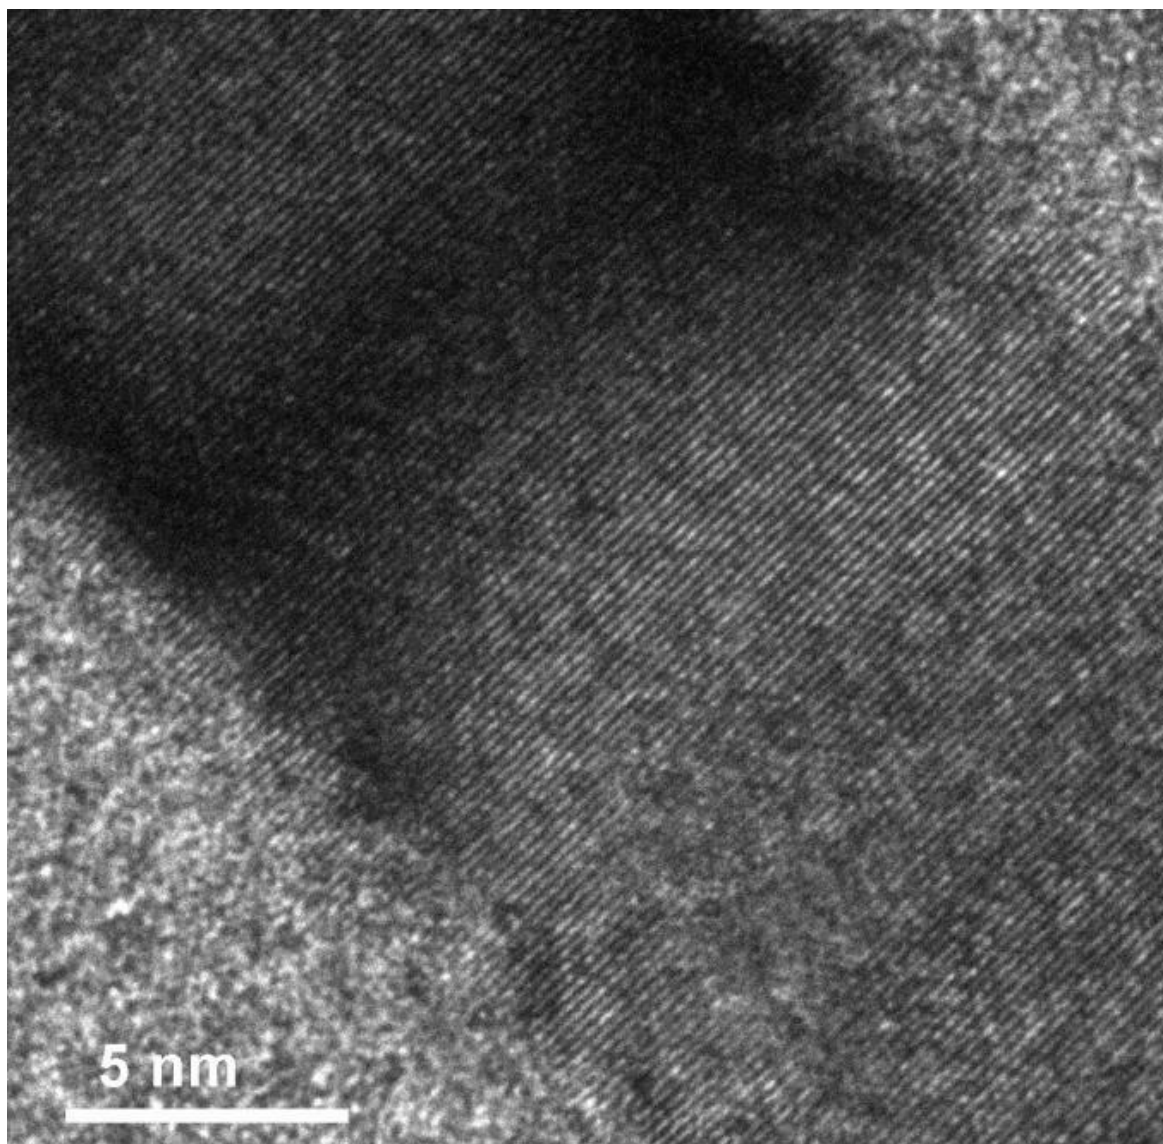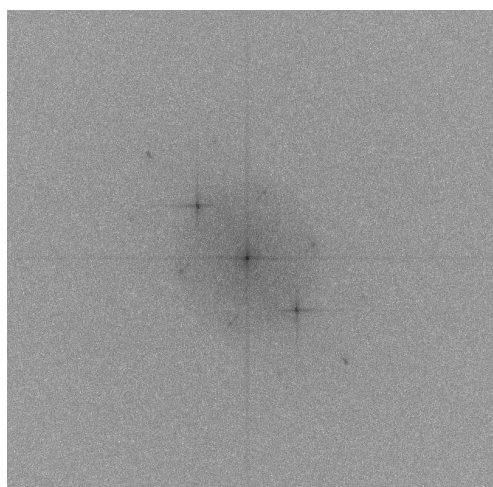

**Figure S2.** (top) HRTEM image and (bottom) diffraction pattern with  $\langle 011 \rangle$  zone axis of gold nanorods prepared with Pluronic L-31 (17.9%, Au1).

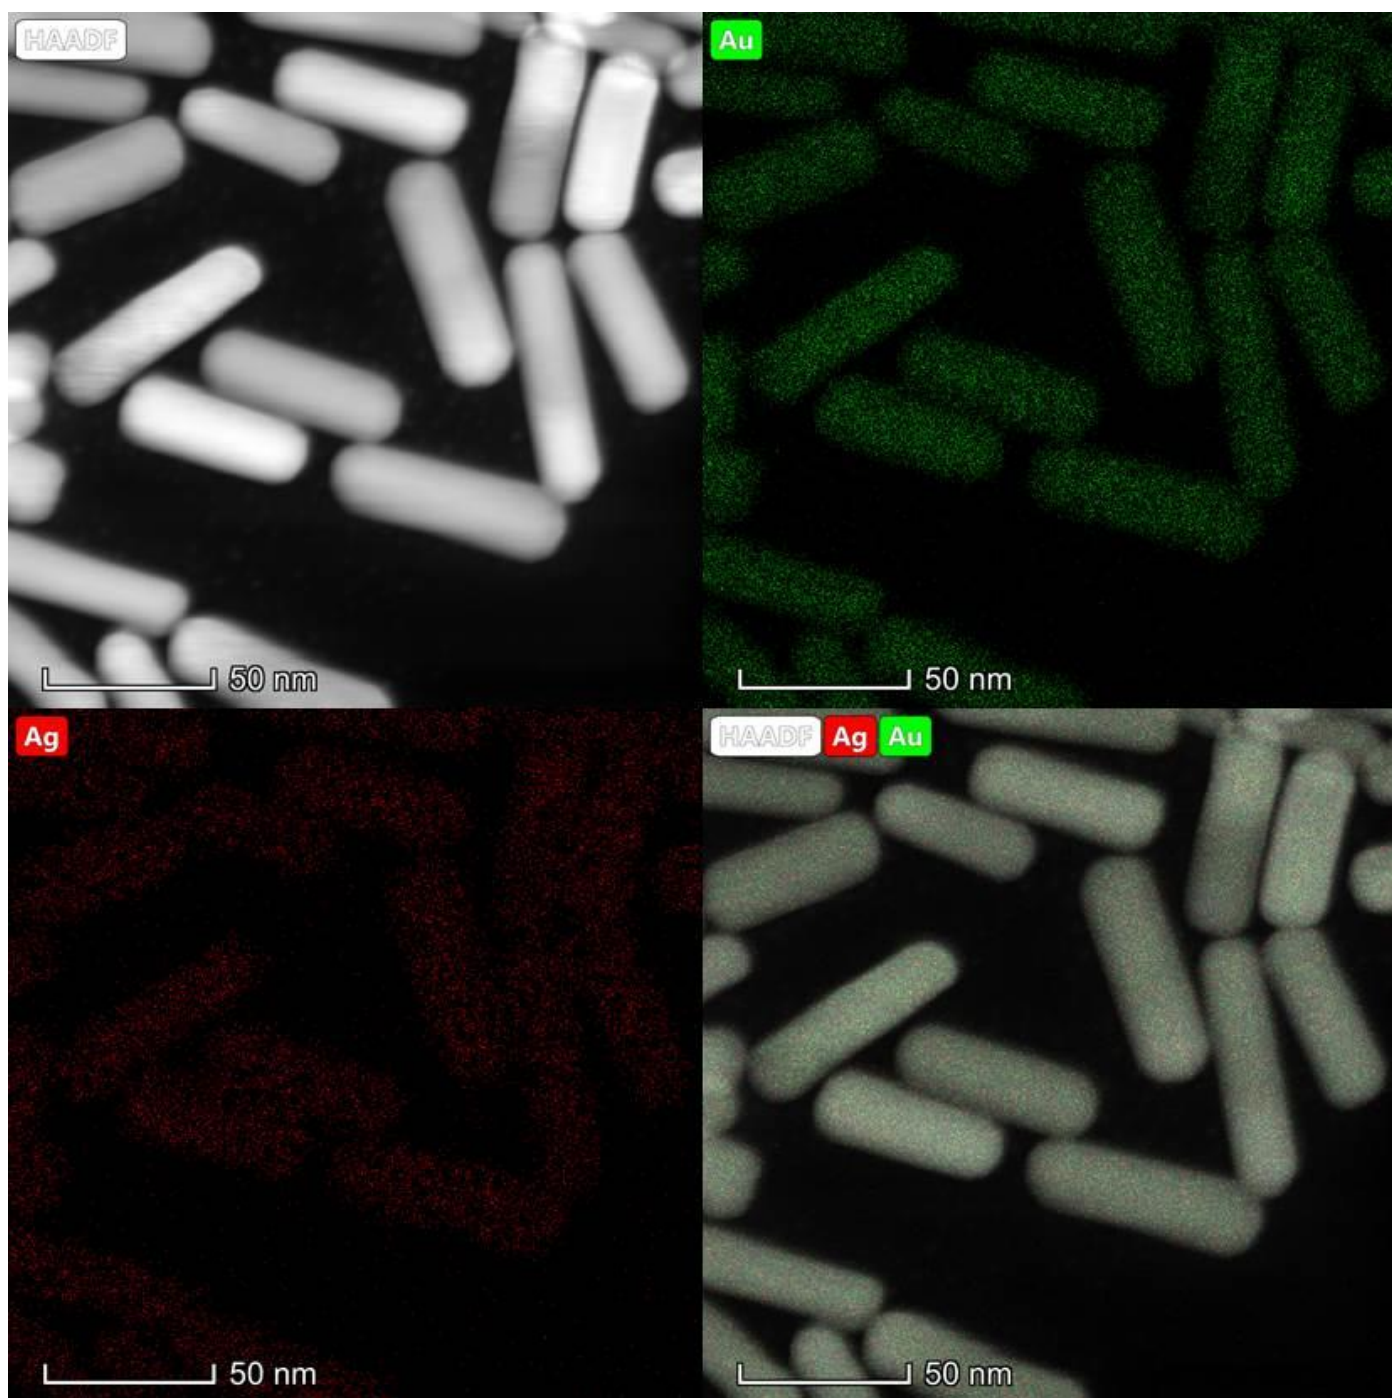

**Figure S3.** Dark field TEM image and elemental mapping of gold nanorods prepared with Pluronic L-31 (17.9%, Au1).



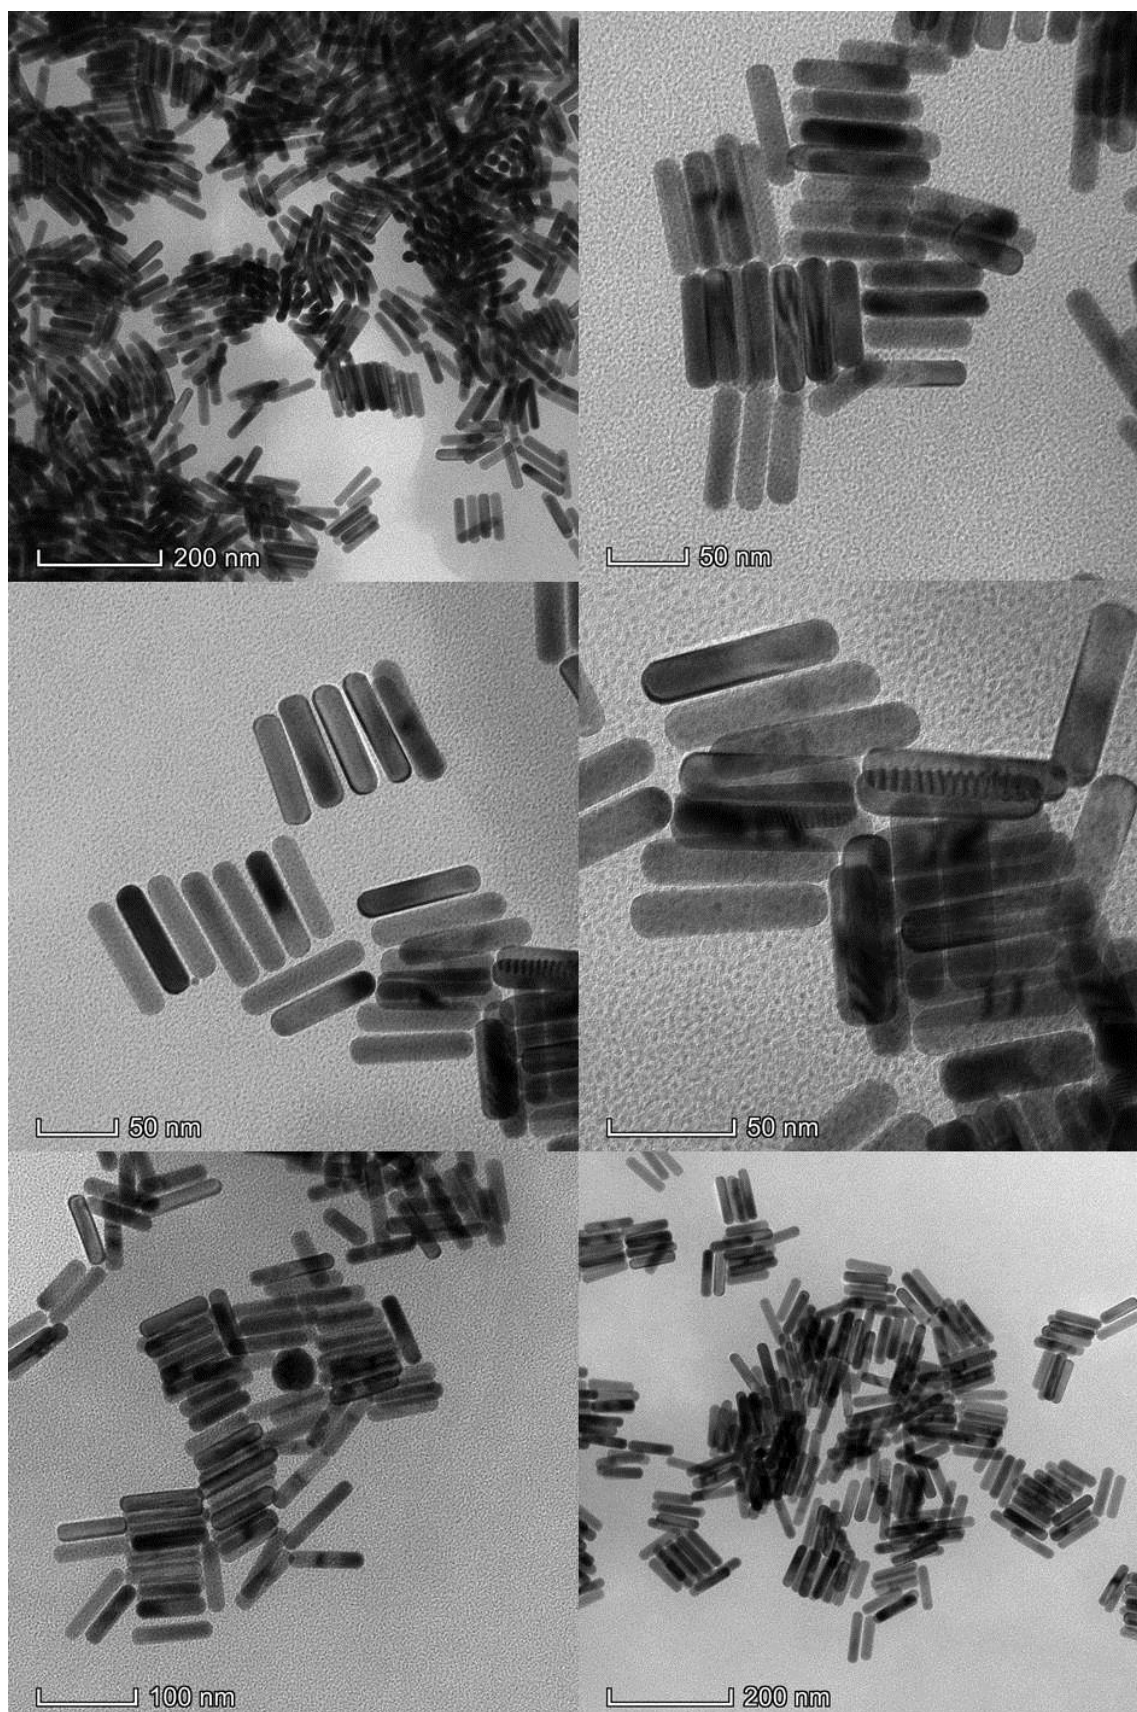

**Figure S4.** TEM images of gold nanorods prepared with Pluronic L-64 (17.9%, Au<sub>2</sub>).

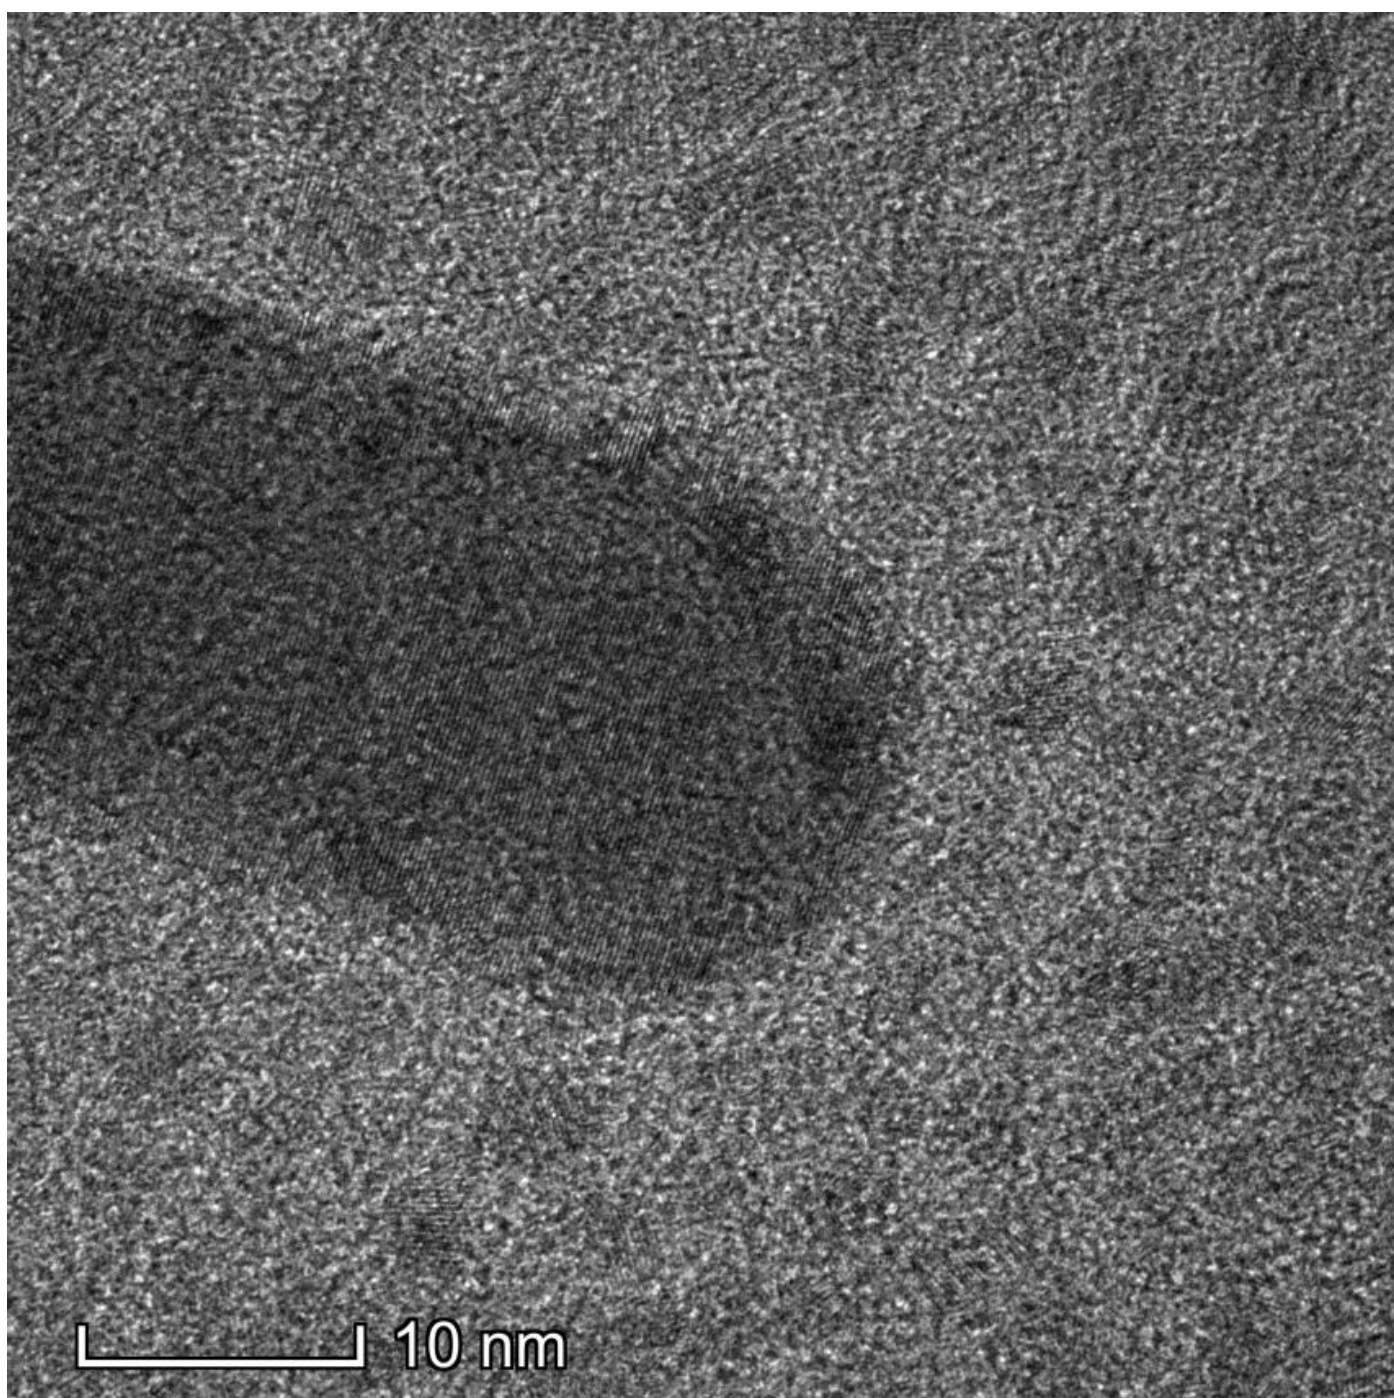

**Figure S5.** TEM image showing small particles around gold nanorod which were prepared with Pluronic L-64 (17.9%, Au<sub>2</sub>).

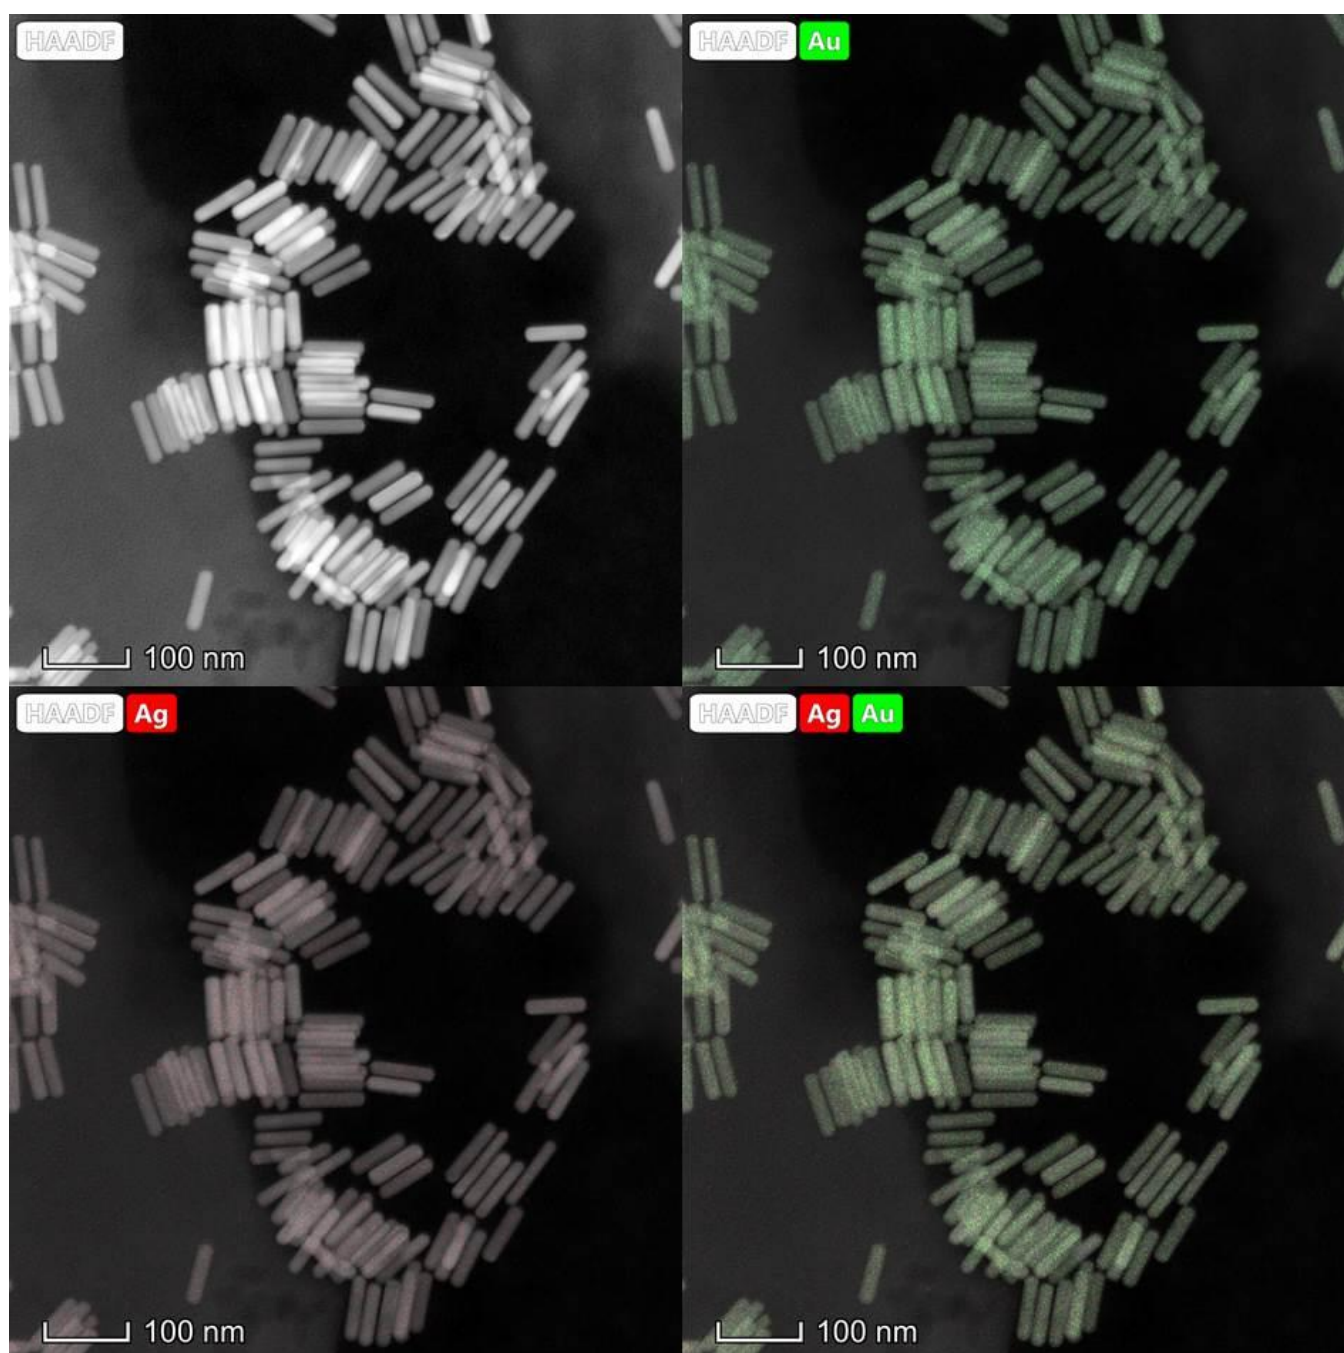

**Figure S6.** Dark field TEM image and elemental mapping of gold nanorods prepared with Pluronic L-64 (17.9%, Au<sub>2</sub>).



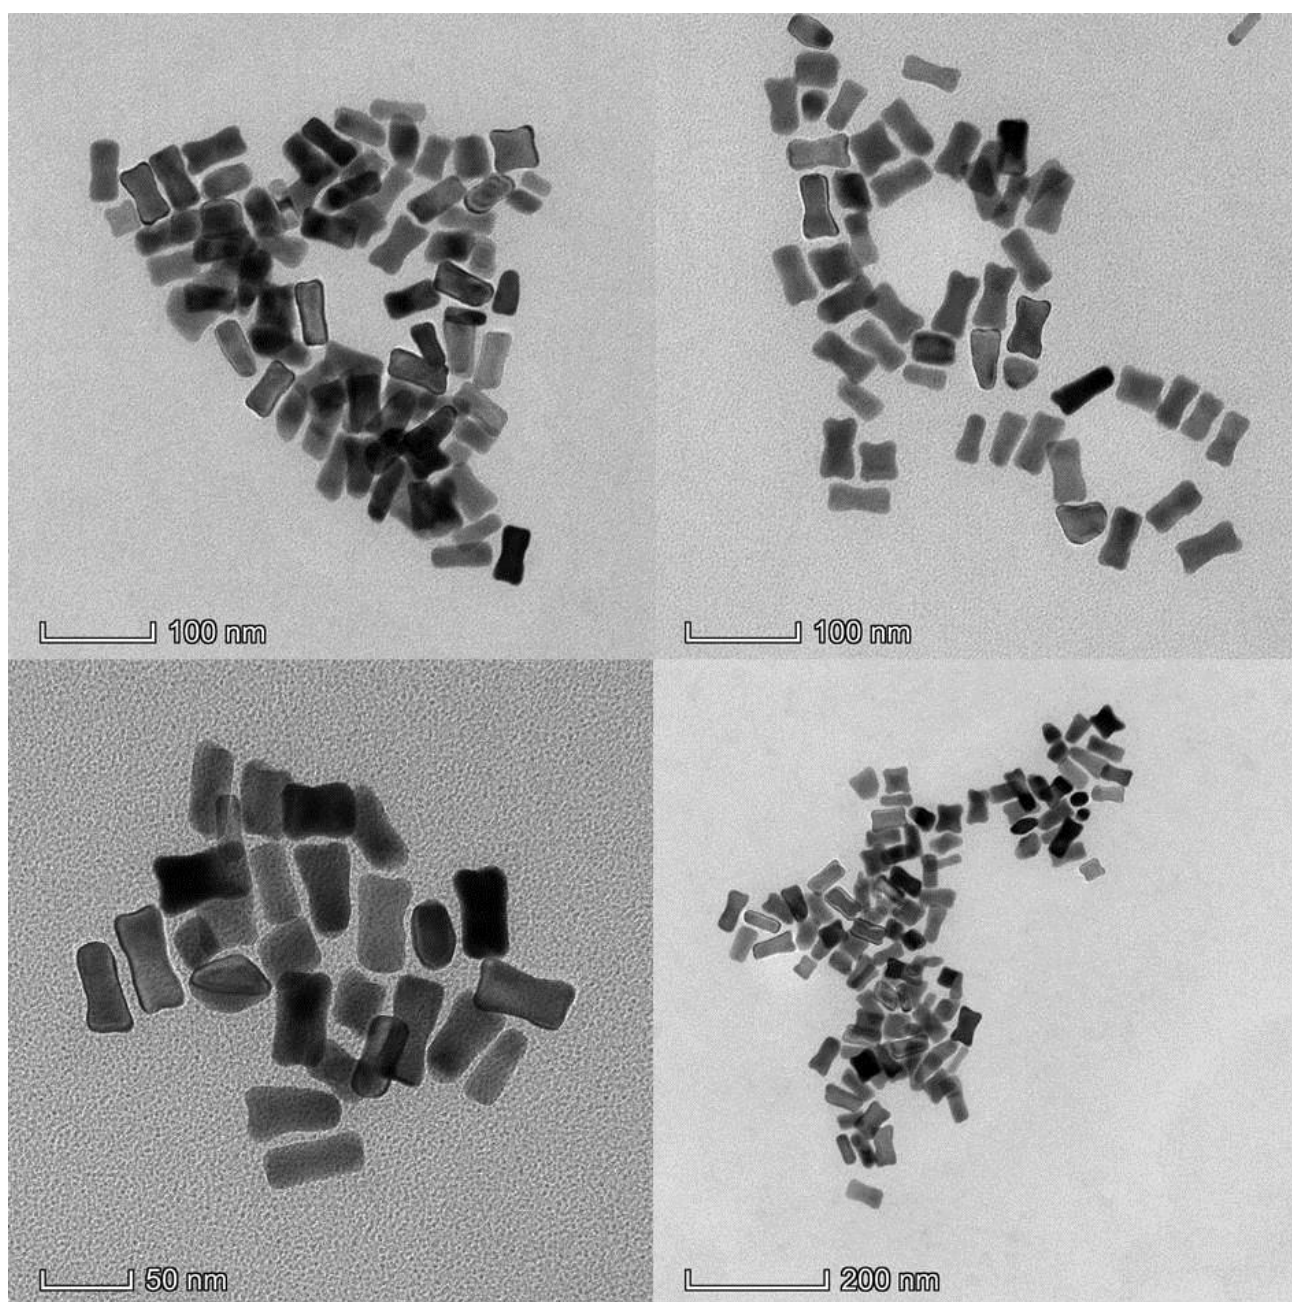

**Figure S7.** TEM images of gold nanoparticles prepared with Pluronic F-68 (17.9%, Au<sub>3</sub>).



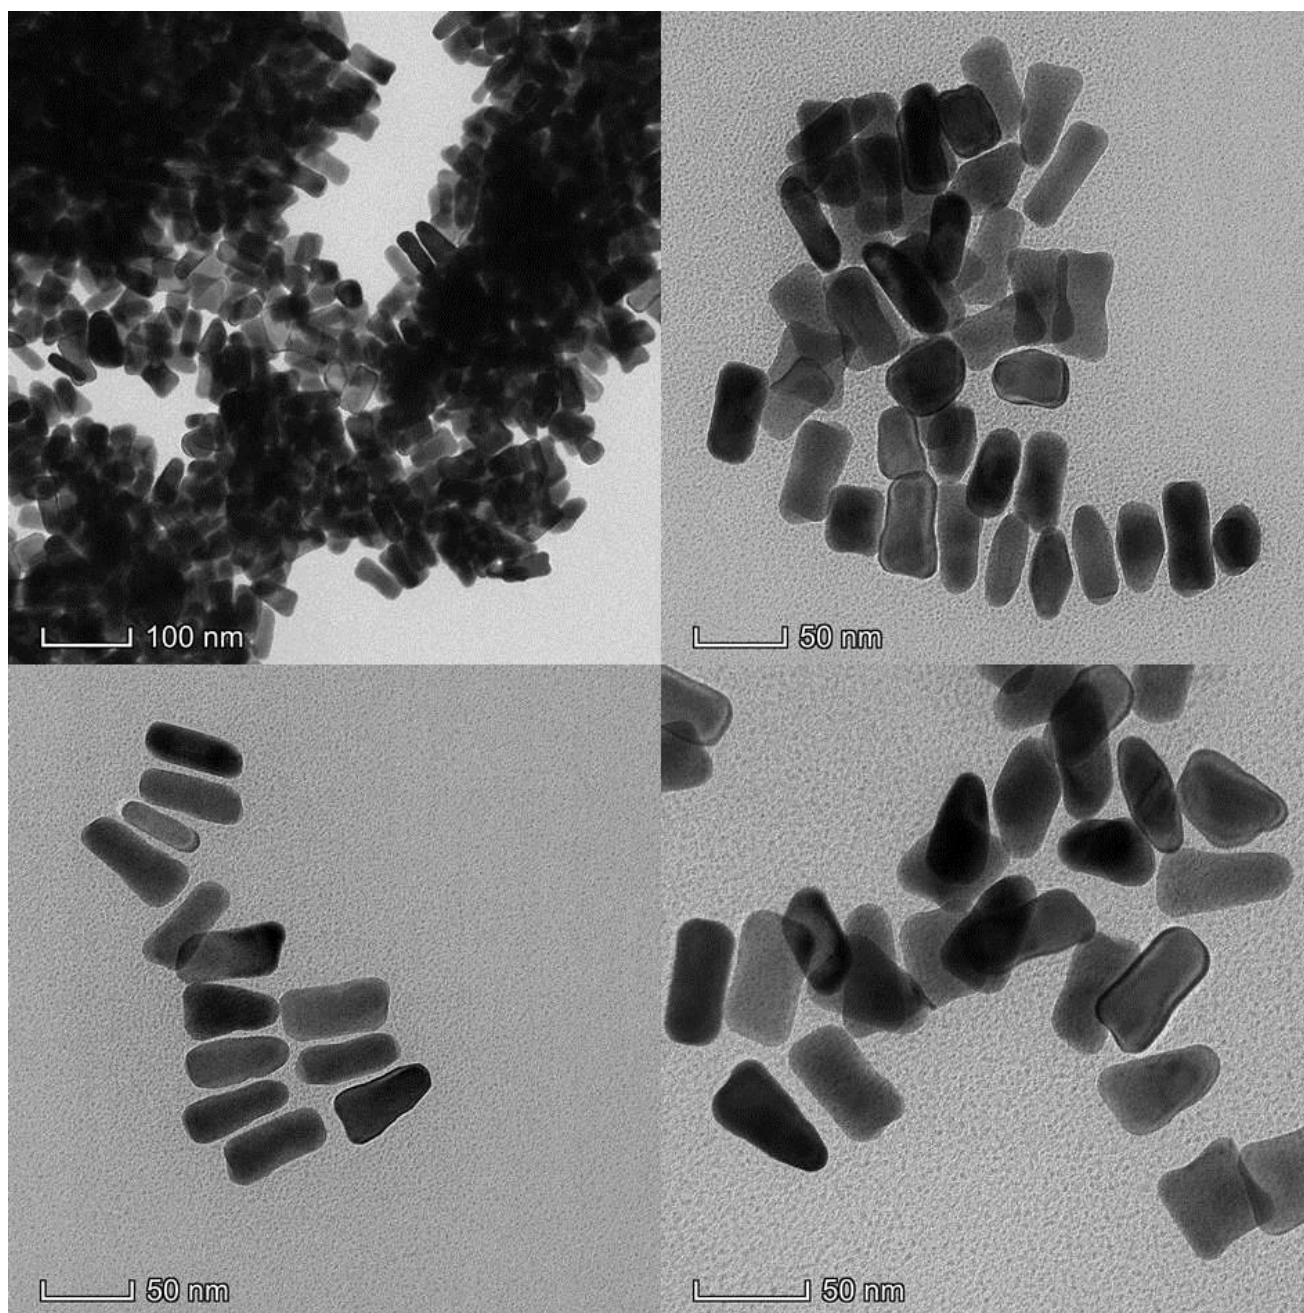

**Figure S8.** TEM images of gold nanoparticles prepared with Pluronic F-108 (17.9%, Au<sub>4</sub>).

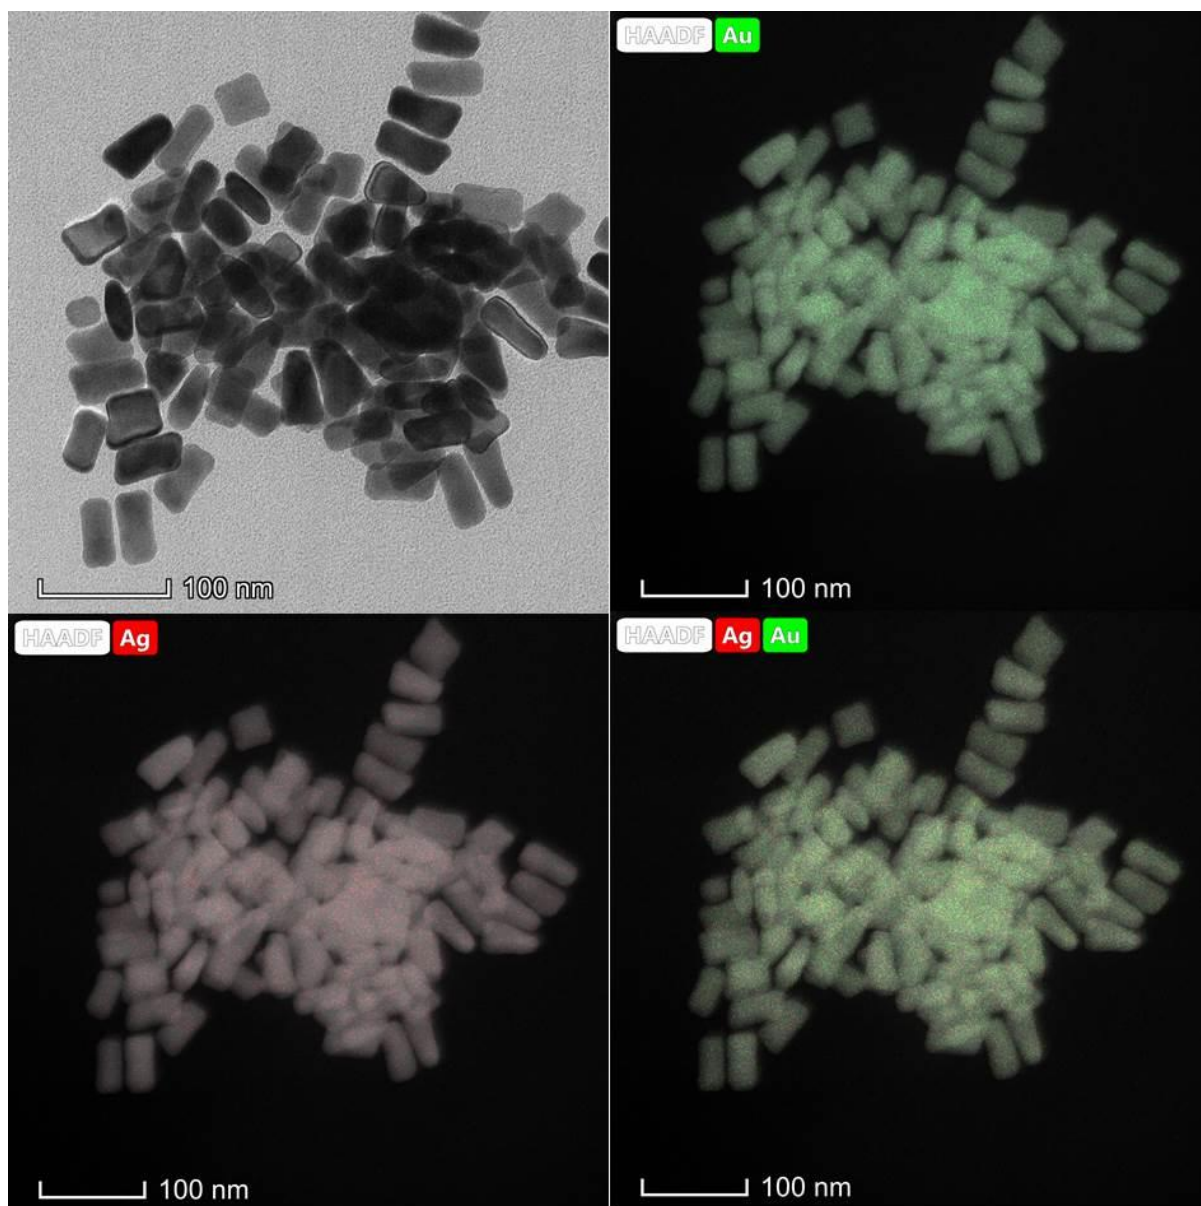

**Figure S9.** TEM image and elemental mapping of gold nanoparticles prepared with Pluronic F-108 (17.9%, Au4).

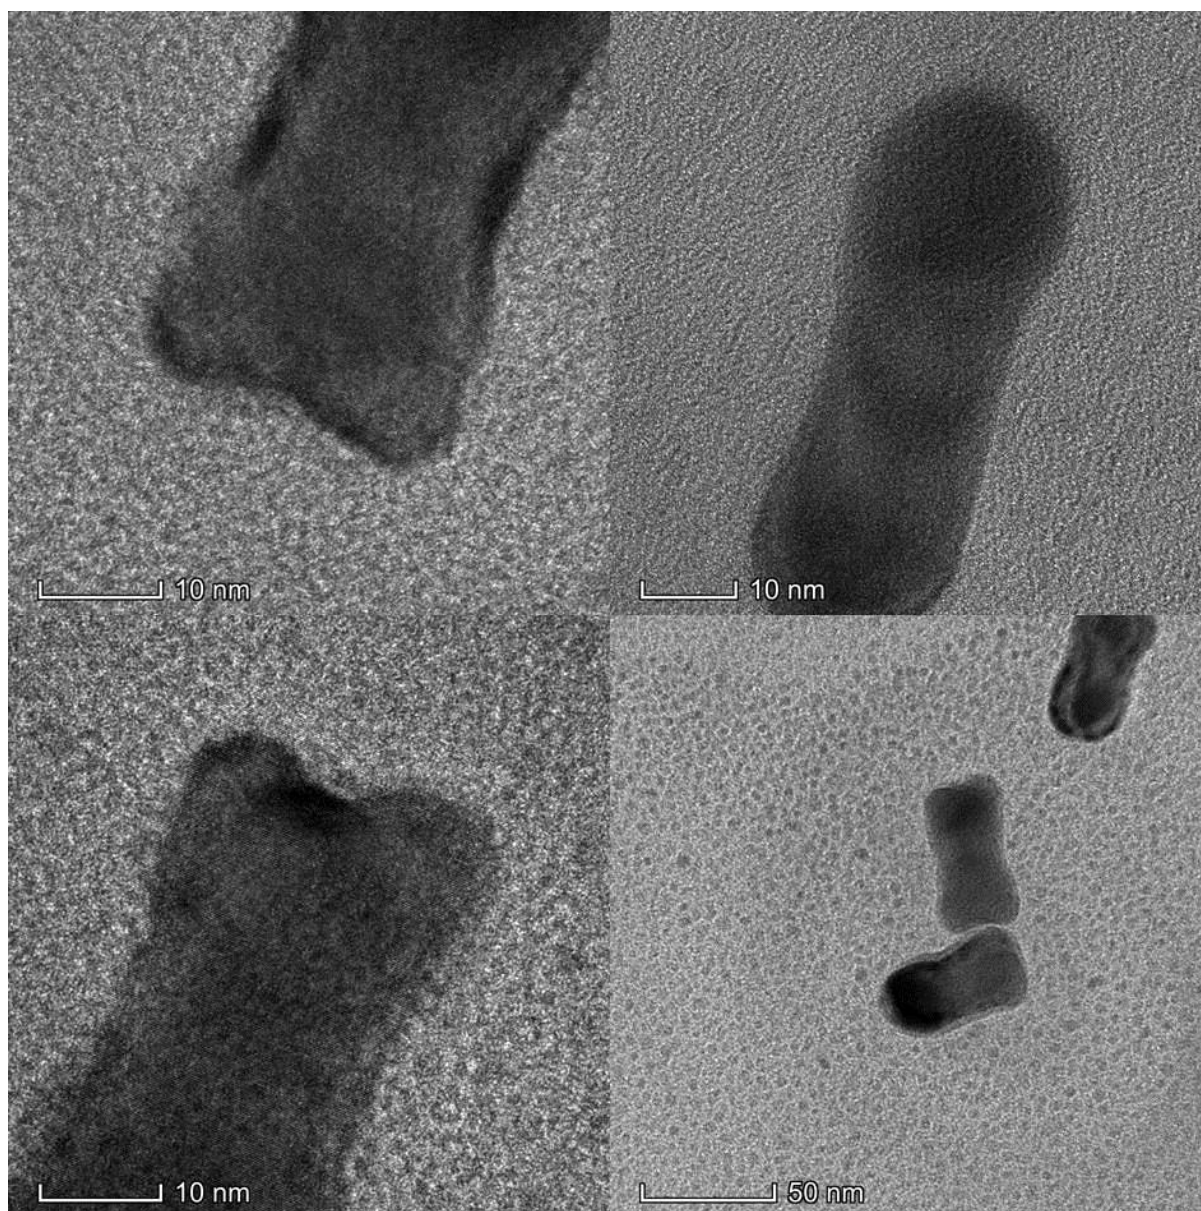

**Figure S10.** TEM images of gold nanoparticles prepared with Pluronic F-127 (17.9%, Au5).



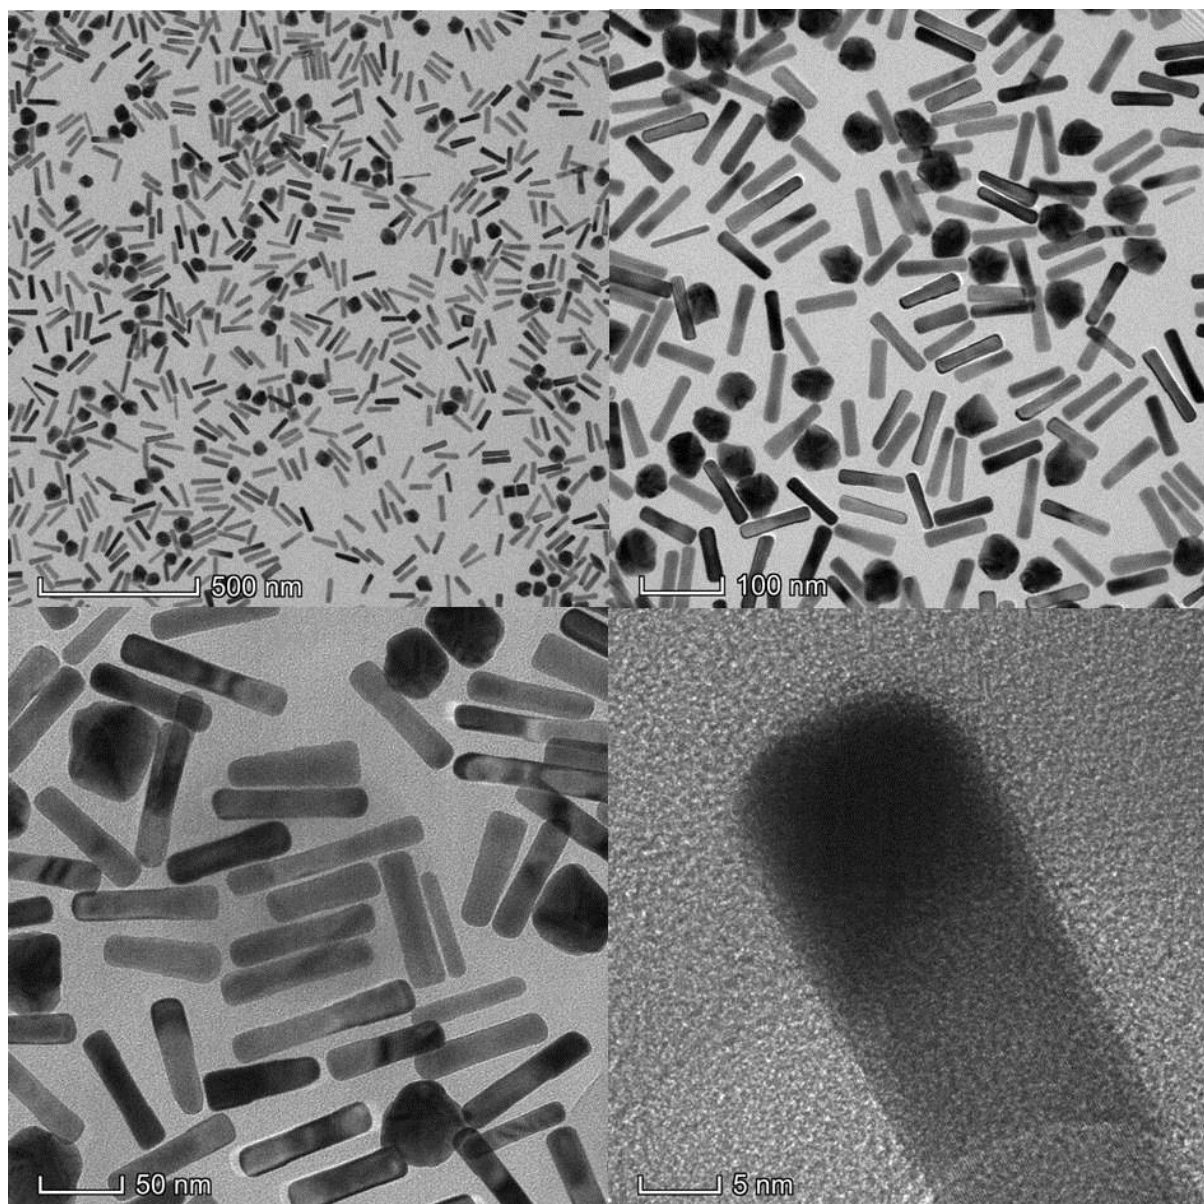

**Figure S11.** TEM images of gold nanoparticles prepared with Pluronic L-64 (35.9%, Au6).

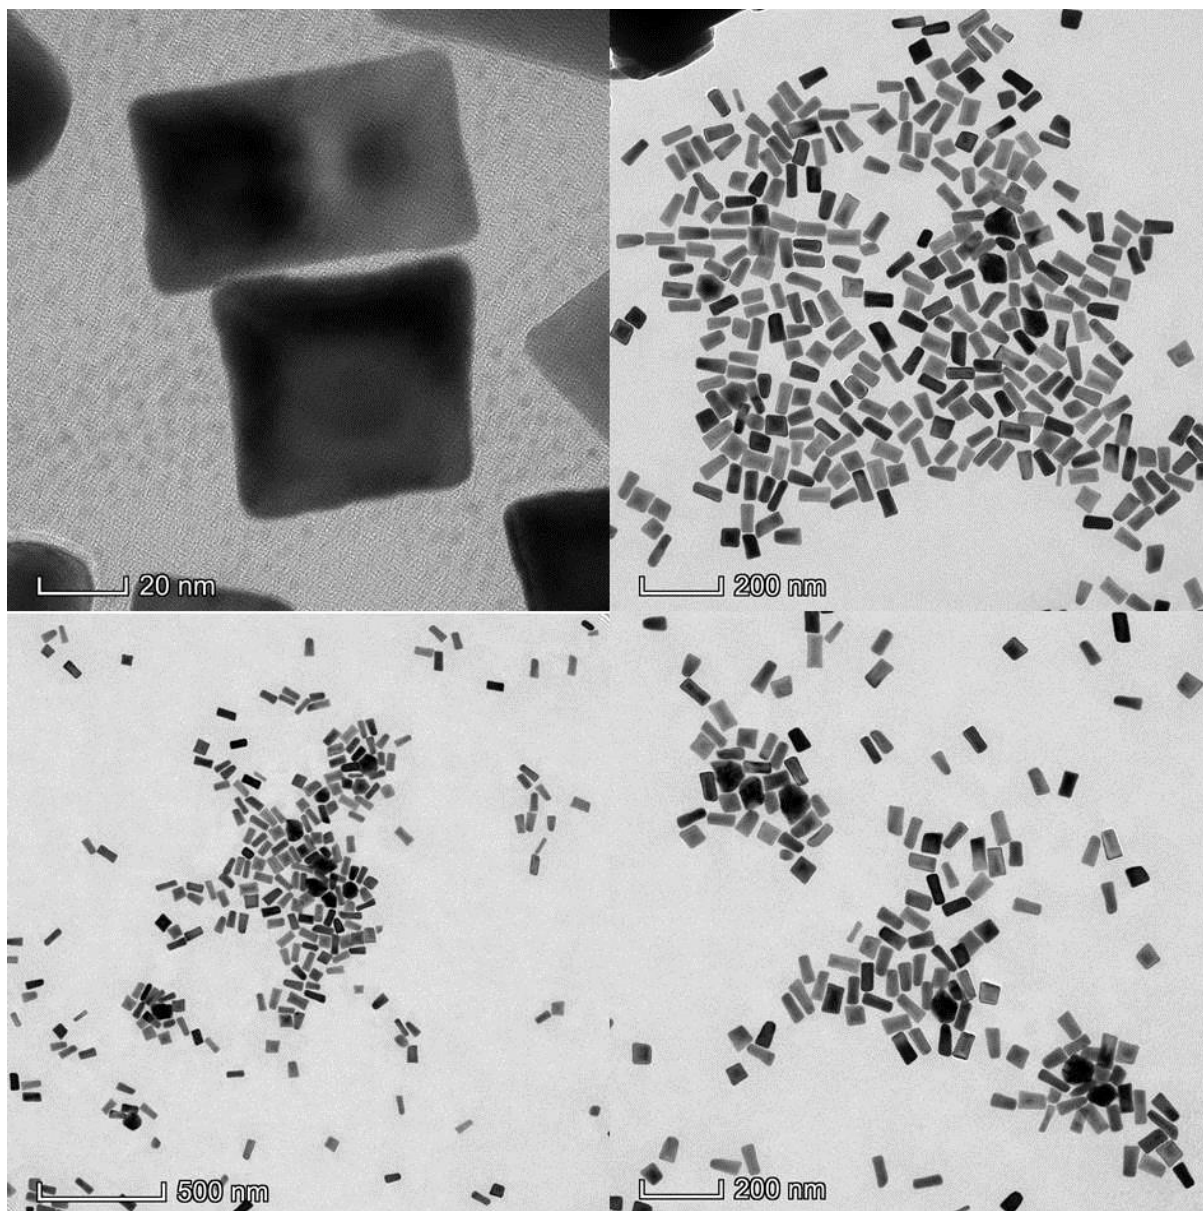

**Figure S12.** TEM images of gold nanoparticles prepared with Pluronic L-64 (17.9%) and  $\text{AgNO}_3$  (100  $\mu\text{L}$ , Au7).

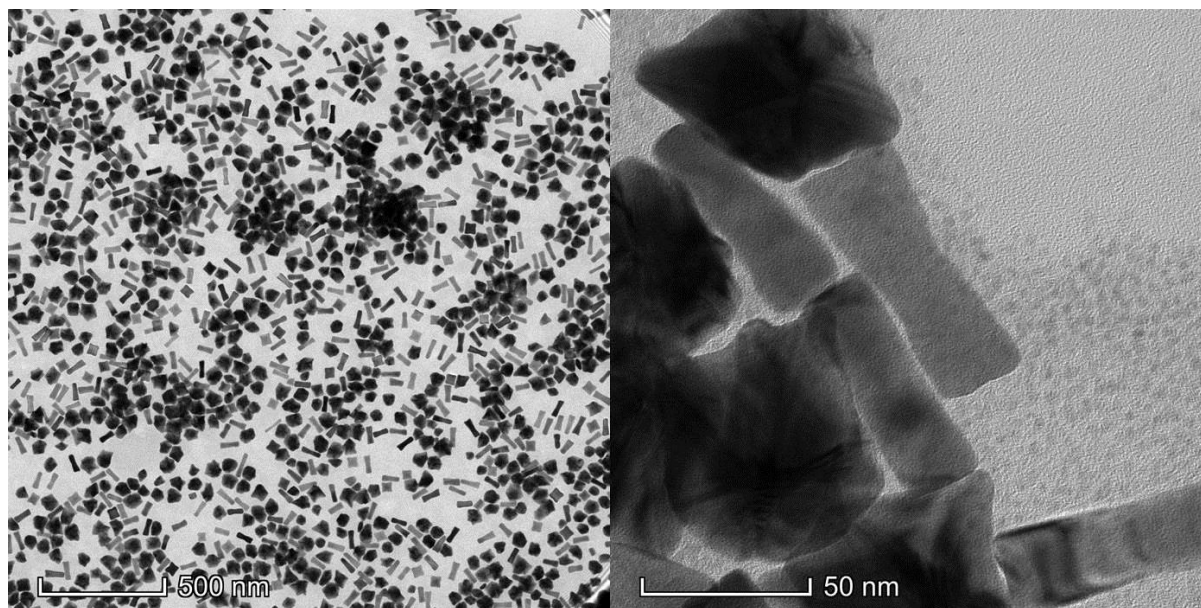

**Figure S13.** TEM images of gold nanoparticles prepared with Pluronic L-64 (17.9%) and  $\text{AgNO}_3$  (300  $\mu\text{L}$ , Au8).



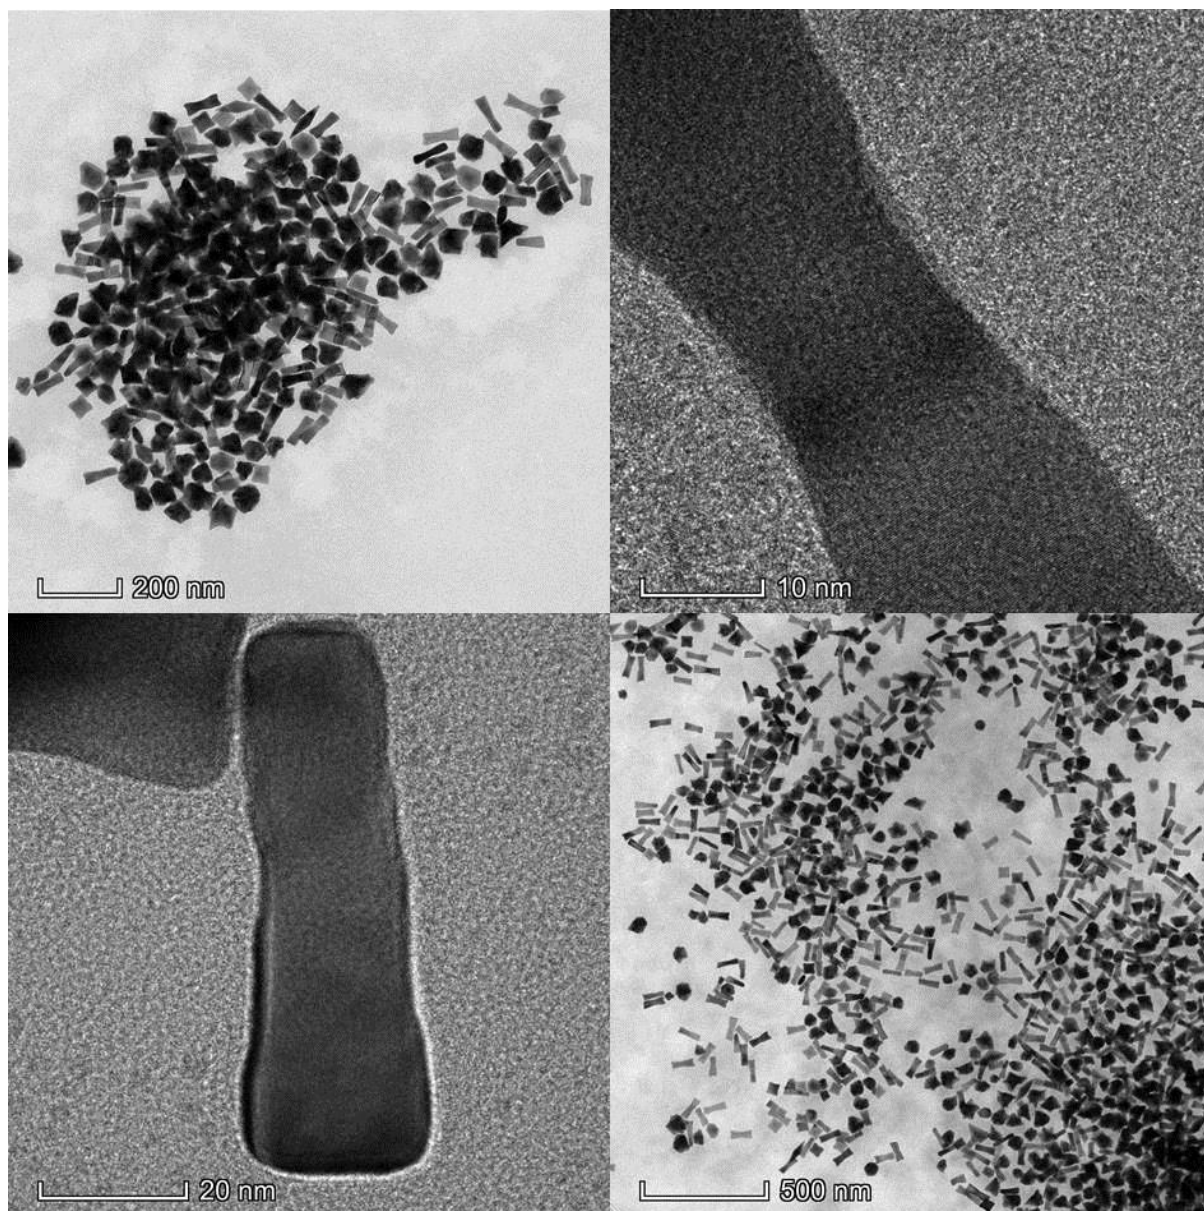

**Figure S14.** TEM images of gold nanoparticles prepared with Pluronic L-64 (35.9%) and  $\text{AgNO}_3$  (300  $\mu\text{L}$ , Au9).

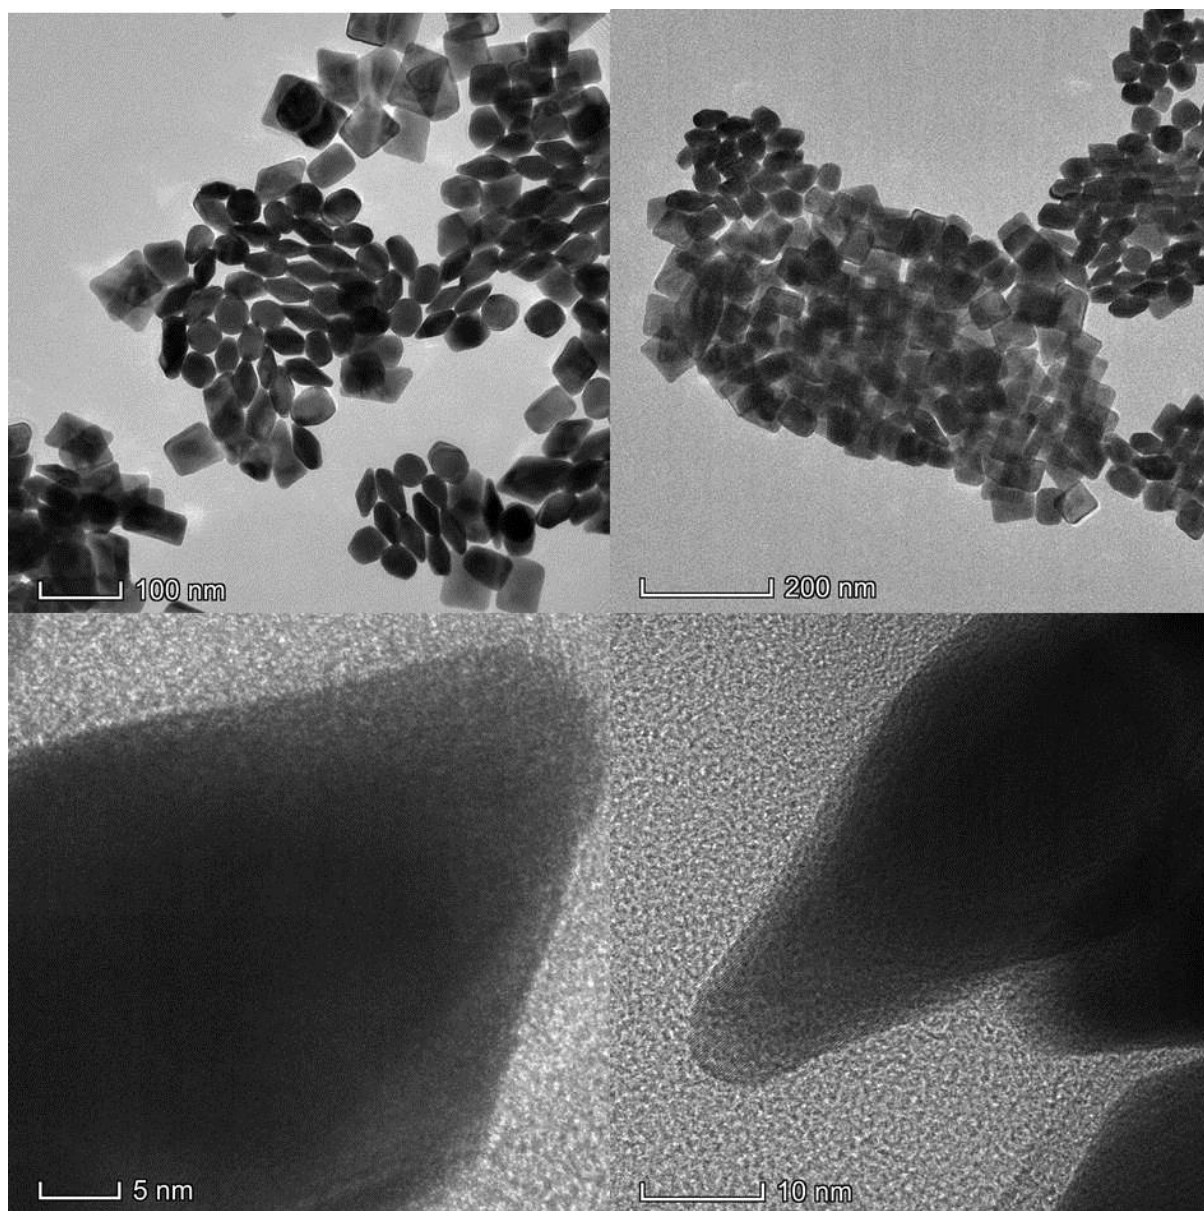

**Figure S15.** TEM images of gold nanoparticles prepared with Pluronic F-68 (17.9%) and  $\text{AgNO}_3$  (100  $\mu\text{L}$ , Au10).

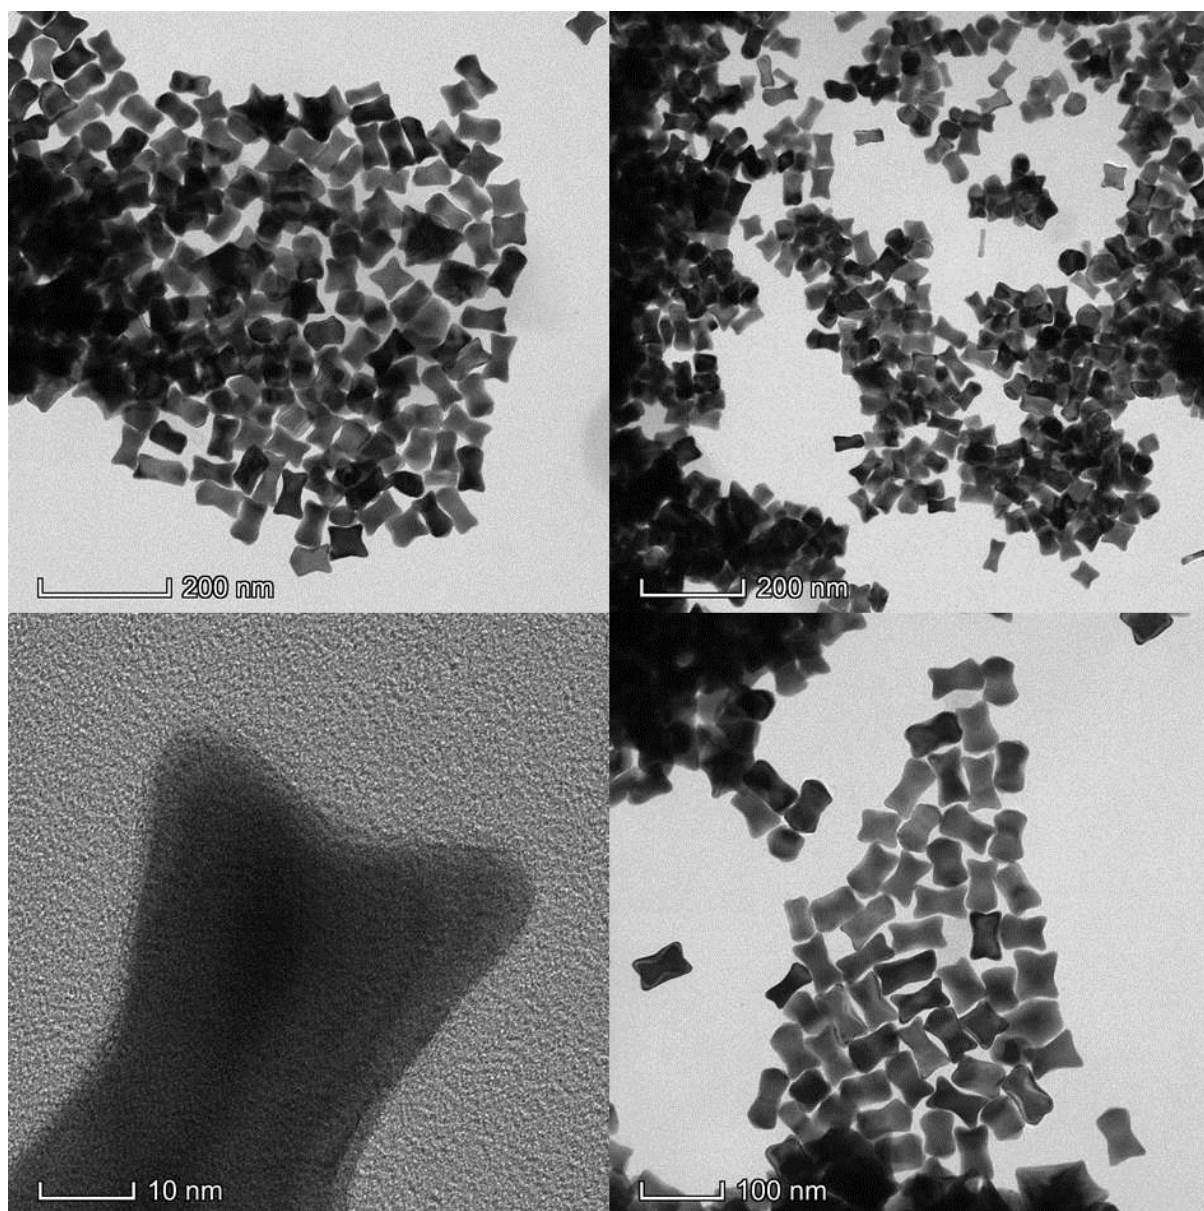

**Figure S16.** TEM images of gold nanoparticles prepared with Pluronic F-68 (17.9%) and  $\text{AgNO}_3$  (300  $\mu\text{L}$ , Au11).



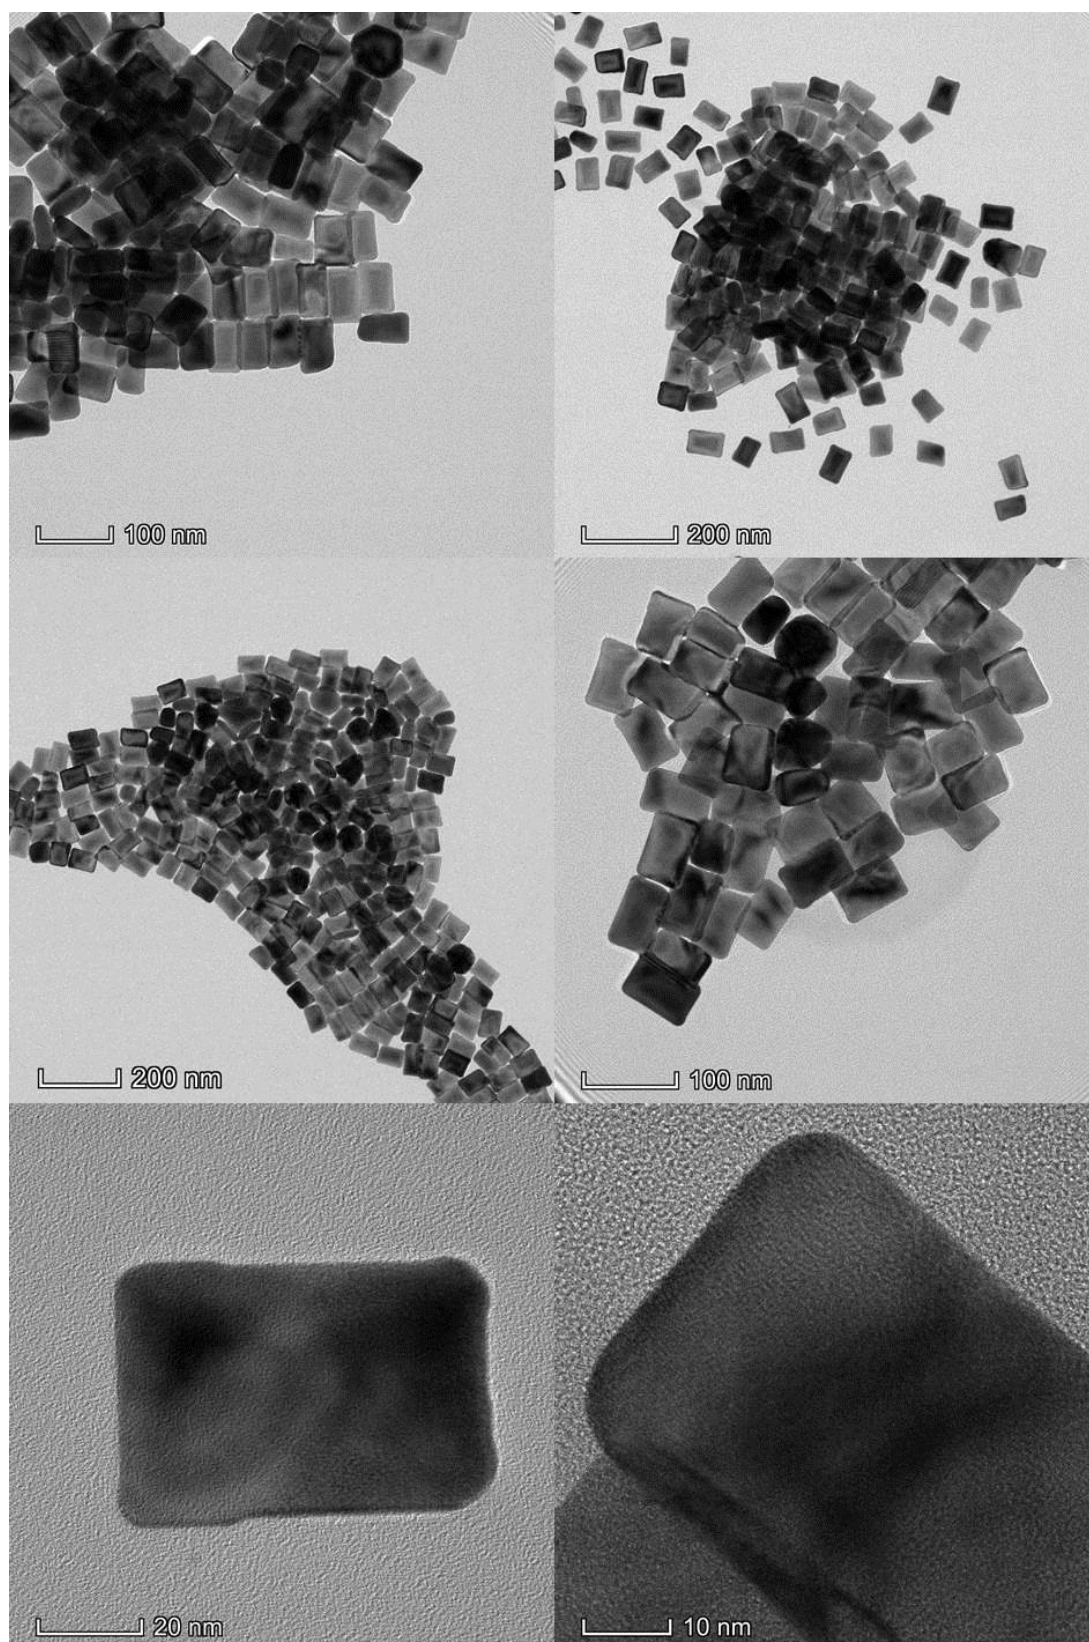

**Figure S17.** TEM images of gold nanoparticles prepared with Pluronic F-68 (35.9%) and  $\text{AgNO}_3$  (100  $\mu\text{L}$ , Au12).

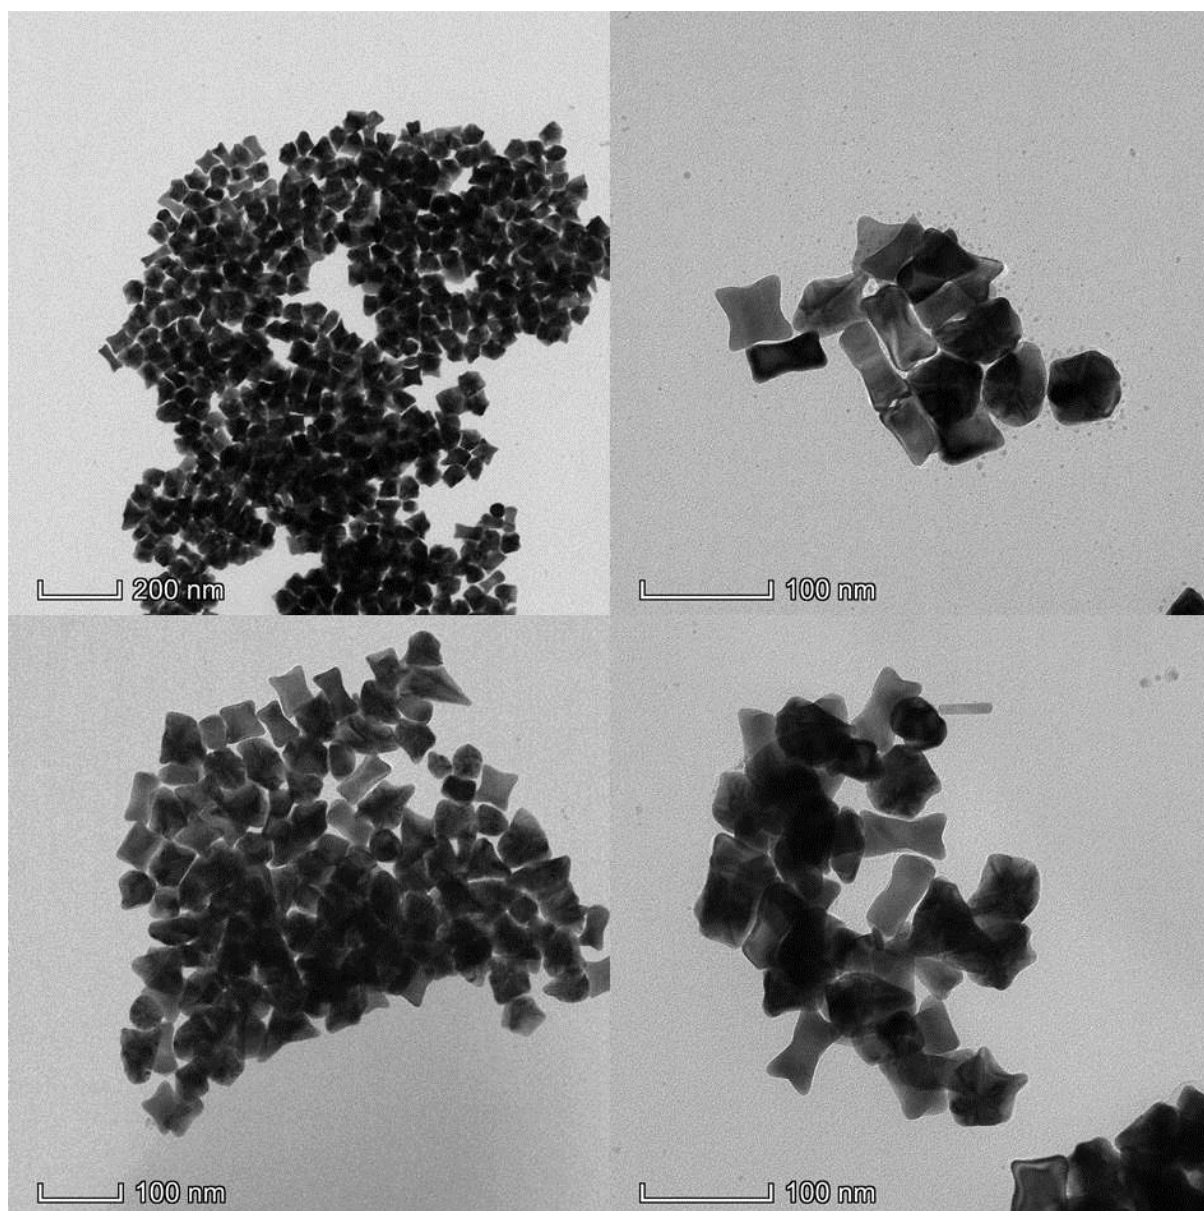

**Figure S18.** TEM images of gold nanoparticles prepared with Pluronic F-68 (35.9%) and  $\text{AgNO}_3$  (300  $\mu\text{L}$ , Au13).
